# Supplementary material
Source: publisher figshare collection journal article supplement (https://tandf.figshare.com/ndownloader/files/15176858)
Supplement: Supplementary file 1 [file 15176858]

### Supplemental Online Material

The following scenario was read and provided to all participants before they performed their first manual transfer with the standardized patient:

- Mrs. Perry is a 75-year old woman with mild cognitive impairment. She moved to Schlegel Villages' (Winston Park) 8 weeks ago, because the level of care that she needed at home became too much for her daughter. Mrs. Perry has a history of wandering at night, is urine incontinent, and does not eat her meals without prompt. Mrs. Perry became a widow 4 years ago and moved in with her daughter at this time.
- As Mrs. Perry's personal support worker (PSW), you will assist her with her morning routine, which includes getting her out of bed and ready for breakfast.
- Mrs. Perry has adequate upper body strength to sit-up in her bed without any assistance. She is able to get herself into a seated position, move to the edge of the bed, and turn to face you so that her lower legs hang off the edge of the bed. However, you have noticed that Mrs. Perry has some balance problems when she stands up, making her unstable when standing upright, walking, or performing movements (e.g., turning, bending down, reaching away from her body)
- Despite the balance problems, she does have adequate lower body strength to weight-bear while standing, but has difficulty getting from a seated to a standing position as well as lowering herself into a chair in a controlled manner.
- The team assessed Mrs Perry and decided that she is unable to safely transfer herself from a seated position on the bed to a chair. The care plan indicates that Mrs. Perry requires a 1-Person assisted (pivot) transfer. Mrs. Perry understands and can follow instructions when given.
- **Please assist Mrs. Perry from the edge of her bed to the chair beside the bed.**
